# Supplementary material for: Multi-analytical approach to understand biomineralization of gold using rice bran: A novel and economical route
Source: Royal Society of Chemistry journal article supplement (doi:10.1039/c4ra05404k), 2014-08-20
Supplement: c4ra05404k1.pdf [file c4ra05404k1.pdf]

## Acquisition Method Info

**Method Name** C18\_Small Mol..m  
**Method Path** D:\MassHunter\methods\C18\_Small Mol..m  
**Method Description** Default Method

### Device List

HiP Sampler  
Binary Pump  
Column Comp.  
Q-TOF

### TOF/Q-TOF Mass Spectrometer

|                      |              |                         |                  |
|----------------------|--------------|-------------------------|------------------|
| Component Name       | MS Q-TOF     | Component Model         | G6550A           |
| Ion Source           | Dual AJS ESI | Stop Time (min)         | No Limit/As Pump |
| Can wait for temp.   | Enable       | Fast Polarity           | N/A              |
| MS Abs. threshold    | 200          | MS Rel. threshold(%)    | 0.010            |
| MS/MS Abs. threshold | 5            | MS/MS Rel. threshold(%) | 0.010            |
| Tune File            | AutoTune.tun |                         |                  |

### Time Segments

| Time Segment # | Start Time (min) | Diverter Valve State | Storage Mode | Ion Mode     |
|----------------|------------------|----------------------|--------------|--------------|
| 1              | 0                | MS                   | Both         | Dual AJS ESI |

### Time Segment 1

#### Acquisition Mode MS1

|                         |      |
|-------------------------|------|
| Min Range (m/z)         | 100  |
| Max Range (m/z)         | 500  |
| Scan Rate (spectra/sec) | 2.00 |

#### Source Parameters

| Parameter        | Value |
|------------------|-------|
| Gas Temp (°C)    | 120   |
| Gas Flow (l/min) | 10    |
| Nebulizer (psig) | 35    |
| SheathGasTemp    | 200   |
| SheathGasFlow    | 11    |

#### Scan Segments

| Scan Seg # | Ion Polarity |
|------------|--------------|
| 1          | Positive     |

### Scan Segment 1

#### Scan Source Parameters

| Parameter          | Value |
|--------------------|-------|
| VCap               | 4000  |
| Nozzle Voltage (V) | 1000  |
| Fragmentor         | 150   |
| Skimmer1           | 40    |
| OctopoleRFPeak     | 500   |

### ReferenceMasses

|                      |          |
|----------------------|----------|
| Ref Mass Enabled     | Disabled |
| Ref Nebulizer (psig) |          |

### Chromatograms

| Chrom Type | Label | Offset | Y-Range  |
|------------|-------|--------|----------|
| TIC        | TIC   | 15     | 10000000 |

**Name:**     **HiP Sampler**

**Model:**    **G4226A**

**Auxiliary**

|                          |              |
|--------------------------|--------------|
| Draw Speed               | 100.0 µl/min |
| Eject Speed              | 100.0 µl/min |
| Draw Position Offset     | 0.0 mm       |
| Wait Time After Drawing  | 2.0 s        |
| Sample Flush Out Factor  | 5.0          |
| Vial/Well bottom sensing | No           |

**Injection**

|                  |                            |
|------------------|----------------------------|
| Injection Mode   | Injection with needle wash |
| Injection Volume | 1.00 µL                    |

**Needle Wash**

|                      |            |
|----------------------|------------|
| Needle Wash Location | Flush Port |
| Wash Time            | 3.0 s      |

**High throughput**

|                                  |    |
|----------------------------------|----|
| Automatic Delay Volume Reduction | No |
|----------------------------------|----|

**Overlapped Injection**

|                             |    |
|-----------------------------|----|
| Enable Overlapped Injection | No |
|-----------------------------|----|

**Valve Switching**

|                 |   |
|-----------------|---|
| Valve Movements | 0 |
|-----------------|---|

**Valve Switch Time 1**

|                       |    |
|-----------------------|----|
| Switch Time 1 Enabled | No |
|-----------------------|----|

**Valve Switch Time 2**

|                       |    |
|-----------------------|----|
| Switch Time 2 Enabled | No |
|-----------------------|----|

**Valve Switch Time 3**

|                       |    |
|-----------------------|----|
| Switch Time 3 Enabled | No |
|-----------------------|----|

**Valve Switch Time 4**

|                       |    |
|-----------------------|----|
| Switch Time 4 Enabled | No |
|-----------------------|----|

**Stop Time**

|               |                  |
|---------------|------------------|
| Stoptime Mode | As pump/No limit |
|---------------|------------------|

**Post Time**

|               |     |
|---------------|-----|
| Posttime Mode | Off |
|---------------|-----|

**Name:** Binary Pump

**Model:** G4220B

|                     |                             |
|---------------------|-----------------------------|
| Flow                | 0.200 ml/min                |
| Use Solvent Types   | Yes                         |
| Stroke Mode         | Synchronized                |
| Low Pressure Limit  | 0.00 bar                    |
| High Pressure Limit | 1000.00 bar                 |
| Max. Flow Ramp Up   | 100.000 ml/min <sup>2</sup> |
| Max. Flow Ramp Down | 100.000 ml/min <sup>2</sup> |
| Expected Mixer      | No check                    |

**Stroke A**

|                                |     |
|--------------------------------|-----|
| Automatic Stroke Calculation A | Yes |
|--------------------------------|-----|

**Compress A**

|                        |                           |
|------------------------|---------------------------|
| Compressibility Mode A | Compressibility Value Set |
| Compressibility A      | 45 10e-6/bar              |

**Compress B**

|                        |                           |
|------------------------|---------------------------|
| Compressibility Mode B | Compressibility Value Set |
| Compressibility B      | 75 10e-6/bar              |

**Stop Time**

|               |           |
|---------------|-----------|
| Stoptime Mode | Time set  |
| Stoptime      | 13.00 min |

**Post Time**

|               |     |
|---------------|-----|
| Posttime Mode | Off |
|---------------|-----|

**Timetable**
**Timetable**

|   | Time      | Function                   | Parameter                                |
|---|-----------|----------------------------|------------------------------------------|
| 1 | 3.00 min  | Change Solvent Composition | Solvent composition A: 80.00 % B:20.00 % |
| 2 | 6.00 min  | Change Solvent Composition | Solvent composition A: 60.00 % B:40.00 % |
| 3 | 8.00 min  | Change Solvent Composition | Solvent composition A: 40.00 % B:60.00 % |
| 4 | 10.00 min | Change Solvent Composition | Solvent composition A: 20.00 % B:80.00 % |
| 5 | 11.00 min | Change Solvent Composition | Solvent composition A: 0.00 % B:100.00 % |
| 6 | 12.00 min | Change Solvent Composition | Solvent composition A: 50.00 % B:50.00 % |
| 7 | 13.00 min | Change Solvent Composition | Solvent composition A: 95.00 % B:5.00 %  |

**Solvent Composition**

|   | Channel | Ch. 1 Solv.                  | Name 1 | Ch2 Solv.                    | Name 2 | Selected | Used | Percent |
|---|---------|------------------------------|--------|------------------------------|--------|----------|------|---------|
| 1 | A       | 100.0 %<br>Water V.02        |        | 100.0 %<br>Water V.02        |        | Ch. 1    | Yes  | 95.00 % |
| 2 | B       | 100.0 %<br>Acetonitrile V.02 |        | 100.0 %<br>Acetonitrile V.02 |        | Ch. 1    | Yes  | 5.00 %  |

**Name:** Column Comp. **Model:** G1316C

Ready when front door open Yes

**Left Temperature Control**

Temperature Control Mode Temperature Set  
 Temperature 35.00 °C

**Enable Analysis Left Temperature**

Enable Analysis Left Temperature On Yes  
 Enable Analysis Left Temperature Value 0.80 °C

**Right Temperature Control**

Right temperature Control Mode Temperature Set  
 Right temperature 35.00 °C

**Enable Analysis Right Temperature**

Enable Analysis Right Temperature On Yes  
 Enable Analysis Right Temperature Value 0.80 °C

**Stop Time**

Stoptime Mode As pump/injector

**Post Time**

Posttime Mode Off
